# Supplementary material for: Association of Rs339939442 in the AHR Gene with Litter Size are Inconsistent among Chinese Indigenous Pigs and Western Commercial Pigs
Source: PubMed Central journal article supplement (PMC7023200; doi:10.3390/ani10010011), 2019-12-19
Supplement: animals-10-00011-s001.pdf [file animals-10-00011-s001.pdf]

Supplementary table

**Table S1.** The specific composition for different analysis of the animals in this study.

| Category                 | Breed  | n <sub>description</sub> | n <sub>litter1</sub> | n <sub>EBV</sub> | n <sub>litter2</sub> | n <sub>genotype</sub> | n <sub>litter3</sub> |
|--------------------------|--------|--------------------------|----------------------|------------------|----------------------|-----------------------|----------------------|
| Chinese<br>Jianghai pigs | JX-EHL | 343                      | 1478                 | 343              | 1478                 | 177                   | 827                  |
|                          | CS-EHL | 156                      | 550                  | /                | /                    | 116                   | 497                  |
|                          | ST-EHL | 75                       | 339                  | /                | /                    | 70                    | 314                  |
|                          | KS-MS  | 263                      | 1210                 | 263              | 1210                 | 153                   | 857                  |
|                          | ST-MS  | 54                       | 215                  | /                | /                    | 47                    | 201                  |
|                          | TC-MS  | 79                       | 283                  | /                | /                    | 73                    | 266                  |
|                          | JXH    | /                        | /                    | /                | /                    | 62                    | /                    |
| Southern<br>Chinese pigs | BMX    | /                        | /                    | /                | /                    | 32                    | /                    |
|                          | WZS    | /                        | /                    | /                | /                    | 20                    | /                    |
| Chinese cultivated breed | SH     | 845                      | 2465                 | 845              | 2465                 | 314                   | 1242                 |
| Chinese lean meat pigs   | TPE-L  | 3095                     | 10264                | 3095             | 10264                | 351                   | 741                  |
|                          | CAN-Y  | 1252                     | 3101                 | 1252             | 3101                 | 425                   | 1165                 |
| Western lean meat pigs   | USA-Y  | 365                      | 1326                 | 365              | 1326                 | 345                   | 1150                 |
|                          | FRA-Y  | 359                      | 704                  | 359              | 704                  | 359                   | 697                  |

n<sub>description</sub>, n<sub>EBV</sub> and n<sub>genotype</sub> respectively represents the number of individuals for descriptive analysis, EBV calculation and genotyping. n<sub>litter1</sub>, n<sub>litter2</sub> and n<sub>litter3</sub> respectively represents the number of litters used for descriptive analysis, EBV calculation and genotyping. JX-EHL represents Jiaoxi Erhualian pig; CS-EHL represents Changshu Erhualian pig; ST-EHL represents Sutai Erhualian pig; KS-MS represents Kunshan Meishan pig; ST-MS represents Sutai Meishan pig; TC-MS represents Taicang Meishan pig; JXH represents JiaXinghei pig; BMX represents Bamaxiang pig; WZS represents Wuzhishan pig; SH representative Suhuai pig; TPE-L represents Taiwanese Landrace pig; CAN-Y represents Canadian Yorkshire pig; USA-Y represents American Yorkshire pig; FRA-Y presents French Yorkshire pig.

**Table S2.** Correlation analysis between year/season and litter size.

| Breed | NBA                      |                            | TNB                      |                            |
|-------|--------------------------|----------------------------|--------------------------|----------------------------|
|       | <i>p</i> <sub>year</sub> | <i>p</i> <sub>season</sub> | <i>p</i> <sub>year</sub> | <i>p</i> <sub>season</sub> |
| KS-MS | 0.000                    | 0.801                      | 6.00E-06                 | 0.694                      |
| SH    | 0.000                    | 0.044                      | 1.52E-04                 | 0.045                      |
| CAN-Y | 0.000                    | 0.000                      | 4.00E-06                 | 0.045                      |
| USA-Y | 0.135                    | 0.098                      | 0.400                    | 0.182                      |
| FRA-Y | 1.41E-04                 | 3.80E-05                   | 5.30E-05                 | 9.30E-05                   |

*p*<sub>year</sub> and *p*<sub>season</sub> respectively represents the *p* value of the correlation between the year and NBA/TNB and the correlation between the season and NBA/TNB. KS-MS represents Kunshan Meishan pig; SH representative Suhuai pig; CAN-Y represents Canadian Yorkshire pig; USA-Y represents American Yorkshire pig; FRA-Y presents French Yorkshire pig.
